# Supplementary material for: Phylogeography of Two Enigmatic Sulphur Butterflies, Colias mongola Alphéraky, 1897 and Colias tamerlana Staudinger, 1897 (Lepidoptera, Pieridae), with Relations to Wolbachia Infection
Source: MDPI journal article supplement (doi:10.3390/insects14120943), 2023-12-13
Supplement: s1 [file s1]

**Table S3.** Variable sites of the studied *Ca-ATPase*, *CAD*, and *H3* nuclear genes fragments among the 17 sequenced samples of *C. mongola*/*C. tamerlana*.

| Sample ID | COI<br>haplotype | CAD |     |     |     |     |     |     |     |     |     |     |     |     |     |     |     |     |     |     |     |     |     |     |
|-----------|------------------|-----|-----|-----|-----|-----|-----|-----|-----|-----|-----|-----|-----|-----|-----|-----|-----|-----|-----|-----|-----|-----|-----|-----|
|           |                  | 13  | 82  | 145 | 148 | 151 | 169 | 178 | 193 | 211 | 246 | 247 | 256 | 298 | 319 | 342 | 352 | 406 | 514 | 541 | 580 | 685 | 719 | 763 |
| CL42m     | hp1a             | C   | G/T | A/G | A   | A   | T   | T   | A/C | C/T | T   | A/T | A   | T   | A   | A   | A   | A/G | A   | C/T | G   | A   | G   | T   |
| Mnt17     | hp1a             | C   | G   | G   | G   | C   | A   | C   | A   | T   | T   | A   | A   | A   | G   | A   | A   | A   | A   | T   | G   | A   | G   | C/T |
| CL34m     | hp1c             | C/T | G/T | A/G | A   | A   | T   | T   | A/C | C/T | T   | A/T | A/T | T   | A   | A   | A   | A/G | A/T | C/T | G   | A   | G   | T   |
| CL39m     | hp2              | C/T | G   | A/G | A/G | A/C | A/T | C/T | A   | C/T | T   | A/T | A/T | A/T | A/G | A   | A/G | A   | A/T | T   | A/G | A/G | G   | T   |
| CL43m     | hp2              | C   | G   | G   | A/G | A/C | A/T | C/T | A/C | T   | T   | A   | A   | A/T | A/G | A   | A   | A   | A   | T   | G   | A   | G   | C/T |
| Mnt18     | hp2              | T   | T   | A   | A   | A   | T   | T   | A   | C   | T   | T   | A   | T   | A   | A   | A   | A   | A   | T   | G   | A   | A   | T   |
| Ku02      | hp2              | C   | G   | G   | G   | C   | A   | C   | A   | T   | T   | A   | A   | A   | G   | A   | A/G | A   | A   | T   | A/G | A/G | G   | T   |
| Mnt28z    | hp3a             | C   | G   | G   | A/G | A/C | A/T | C/T | A/C | T   | T   | A   | A   | T   | A/G | A   | A   | G   | A   | C/T | G   | A   | G   | T   |
| CL40m     | hp3a             | C   | G/T | A/G | A   | A   | T   | T   | A/C | C/T | T   | A/T | A   | T   | A   | A   | A   | G   | A   | C/T | G   | A   | G   | T   |
| Mnt04     | hp3b             | C   | G   | G   | A/G | A/C | A/T | C/T | A/C | T   | T   | A   | A   | A/T | A/G | A/G | A   | A/G | A   | C/T | G   | A   | G   | T   |
| Mnt30z    | hp3d             | C   | G   | G   | A   | A   | T   | T   | C   | T   | T   | A   | A   | T   | A   | A   | A   | G   | A   | C   | G   | A   | G   | T   |
| Ku01      | hp3e             | C/T | G/T | N   | G   | A/C | A/T | C/T | A   | C/T | T   | A/T | A   | T   | A/G | A   | A   | A   | A   | T   | G   | A   | A   | T   |
| Mnt29z    | hp3e             | C   | G/T | A/G | A   | A   | T   | T   | A/C | C/T | G/T | A   | A   | T   | A   | A   | A   | A/G | A   | C/T | G   | A   | G   | T   |
| Mnt20     | hp4a             | C/T | T   | A   | A   | A   | T   | T   | A   | C   | T   | T   | A/T | T   | A   | A   | A   | A   | A/T | T   | G   | A   | G   | T   |
| Mnt21     | hp4a             | C/T | G/T | A/G | A   | A   | T   | T   | A/C | C/T | T   | A/T | A/T | T   | A   | A/G | A   | A/G | A/T | C/T | G   | A   | G   | T   |
| Ku03      | hp4a             | C   | G/T | A/G | A   | A   | T   | T   | A/C | C/T | T   | A/T | A   | T   | A   | A   | A   | A/G | A   | C/T | G   | A   | G   | T   |
| Ku04      | hp4a             | C   | G   | G   | G   | A/C | A/T | C/T | A/C | T   | G/T | A   | A   | T   | G   | A   | A   | N   | A   | C/T | G   | A   | G   | C/T |

**Table S3 (continuation).** Variable sites of the studied *Ca-ATPase*, *CAD*, and *H3* nuclear genes fragments among the 17 sequenced samples of *C. mongola*/*C. tamerlana*.

| Sample ID | COI<br>haplotype | <i>Ca-ATPase</i> |     |     |     | <i>H3</i> |
|-----------|------------------|------------------|-----|-----|-----|-----------|
|           |                  | 238              | 352 | 379 | 406 | 46        |
| CL42m     | hp1a             | C/T              | G   | A   | T   | G         |
| Mnt17     | hp1a             | C                | G   | A/G | C/T | G         |
| CL34m     | hp1c             | C                | G   | A/G | C/T | C         |
| CL39m     | hp2              | C                | G   | A   | T   | G/C       |
| CL43m     | hp2              | C                | A/G | G   | C   | G         |
| Mnt18     | hp2              | C                | G   | A/G | C/T | C         |
| Ku02      | hp2              | T                | G   | A   | T   | G         |
| Mnt28z    | hp3a             | C                | G   | A/G | C/T | G         |
| CL40m     | hp3a             | C                | G   | A/G | C/T | C         |
| Mnt04     | hp3b             | C                | G   | A/G | C/T | G/C       |
| Mnt30z    | hp3d             | C                | G   | A/G | T   | G/C       |
| Ku01      | hp3e             | C                | G   | A   | T   | G/C       |
| Mnt29z    | hp3e             | C                | G   | A   | T   | G/C       |
| Mnt20     | hp4a             | C/T              | G   | A   | T   | C         |
| Mnt21     | hp4a             | C                | G   | A   | T   | G/C       |
| Ku03      | hp4a             | C                | G   | A/G | C/T | G/C       |
| Ku04      | hp4a             | C                | G   | A   | T   | G         |
