# Supplementary material for: Phylogeography of Two Enigmatic Sulphur Butterflies, Colias mongola Alphéraky, 1897 and Colias tamerlana Staudinger, 1897 (Lepidoptera, Pieridae), with Relations to Wolbachia Infection
Source: MDPI journal article supplement (doi:10.3390/insects14120943), 2023-12-13
Supplement: s1 [file s1]

**Table S1.** List of the studied specimens. LT – lectotype; PT – paratype; PLT – paralectotype; \* – DNA barcodes, mined from BOLD; \*\* – numbers in brackets correspond to sampling localities, shown in Figure 3b. Attribution of samples to *mongola/tamerlana* was based on a geographical distribution of the corresponding taxa suggested in previous studies.

| Taxon                     | Sample ID | Sex | COI<br>haplotype | Wolbachia |     |      | Year | Locality                       |
|---------------------------|-----------|-----|------------------|-----------|-----|------|------|--------------------------------|
|                           |           |     |                  | 16S       | wsp | ftsZ |      |                                |
| <i>tamerlana</i>          | Akr01     | ♂   | hp3a             | -         | -   | -    | 2016 | (01)** China, Xinjiang         |
| <i>tamerlana</i>          | Akr02     | ♂   | hp3a             | -         | -   | -    | 2016 | (01) China, Xinjiang           |
| <i>tamerlana</i>          | Akr03     | ♀   | hp3a             | -         | -   | -    | 2016 | (01) China, Xinjiang           |
| <i>tamerlana</i>          | Akr04     | ♀   | hp3a             | -         | -   | -    | 2016 | (01) China, Xinjiang           |
| <i>tamerlana</i>          | CL162     | ♂   | hp3a             | -         | -   | -    | 2016 | (01) China, Xinjiang           |
| <i>tamerlana</i> LT       | 21128B07  | ♂   | hp1b             | n/a       | n/a | n/a  | 1896 | (01) China, Xinjiang           |
| <i>tamerlana</i> PLT      | 20022A02  | ♀   | hp1b             | n/a       | n/a | n/a  | 1896 | (01) China, Xinjiang           |
| <i>mongola</i>            | Mnt03     | ♂   | hp1b             | -         | -   | -    | 2018 | (02) Mongolia, Hovd            |
| <i>mongola</i>            | Mnt04     | ♀   | hp3b             | -         | -   | -    | 2018 | (02) Mongolia, Hovd            |
| <i>mongola</i>            | CL34m     | ♂   | hp1c             | -         | -   | -    | 2015 | (02) Mongolia, Hovd            |
| <i>mongola</i>            | Mnt54     | ♀   | hp1b             | -         | -   | -    | 2003 | (17) Mongolia, Hovd            |
| <i>mongola</i>            | Mnt55     | ♀   | hp2              | +         | +   | +    | 2003 | (17) Mongolia, Hovd            |
| <i>mongola</i>            | Mnt56     | ♀   | hp1b             | -         | -   | -    | 2003 | (17) Mongolia, Hovd            |
| <i>mongola</i>            | Mnt57     | ♀   | hp1b             | -         | -   | -    | 2003 | (17) Mongolia, Hovd            |
| <i>mongola</i>            | Mnt58     | ♀   | hp2              | +         | +   | +    | 2003 | (17) Mongolia, Hovd            |
| <i>mongola</i>            | Mnt59     | ♀   | hp3a             | -         | -   | -    | 2003 | (17) Mongolia, Hovd            |
| <i>mongola</i>            | Mnt60     | ♀   | hp2              | +         | +   | +    | 2003 | (17) Mongolia, Hovd            |
| <i>mongola</i>            | Mnt61     | ♂   | hp1b             | -         | -   | -    | 2003 | (17) Mongolia, Hovd            |
| <i>mongola</i>            | Mnt62     | ♂   | hp2              | +         | +   | +    | 2003 | (17) Mongolia, Hovd            |
| <i>mongola</i>            | Mnt63     | ♂   | hp1b             | -         | -   | -    | 2003 | (17) Mongolia, Hovd            |
| <i>mongola</i>            | Mnt01     | ♀   | hp2              | +         | +   | +    | 2013 | (03) Mongolia, Gobi-Altai      |
| <i>mongola</i>            | Mnt02     | ♀   | hp2              | +         | +   | +    | 2013 | (03) Mongolia, Gobi-Altai      |
| <i>mongola</i>            | CL41m     | ♀   | hp2              | +         | +   | +    | 2017 | (03) Mongolia, Gobi-Altai      |
| <i>mongola</i>            | Nsk16     | ♂   | hp2              | -         | -   | -    | 2005 | (04) Mongolia, Bayan-Ulegej    |
| <i>mongola</i>            | CL39m     | ♀   | hp2              | +         | +   | +    | 2017 | (05) Mongolia, Bayan-Ulegej    |
| <i>mongola</i>            | CL40m     | ♀   | hp3a             | -         | -   | -    | 2017 | (05) Mongolia, Bayan-Ulegej    |
| <i>mongola</i>            | CL43m     | ♀   | hp2              | +         | +   | +    | 2017 | (05) Mongolia, Bayan-Ulegej    |
| <i>mongola</i>            | Mnt24z    | ♀   | hp3a             | -         | -   | -    | 2017 | (05) Mongolia, Bayan-Ulegej    |
| <i>mongola</i>            | Mnt25z    | ♀   | hp4a             | -         | -   | -    | 2017 | (05) Mongolia, Bayan-Ulegej    |
| <i>mongola</i>            | Mnt53     | ♀   | hp2              | +         | +   | +    | 2004 | (16) Mongolia, Zavkhan         |
| <i>mongola ukokana</i>    | Mnt18     | ♀   | hp2              | +         | +   | +    | 2022 | (06) Russia, Republic of Altai |
| <i>mongola ukokana</i>    | Mnt19     | ♀   | hp3c             | -         | -   | -    | 2022 | (06) Russia, Republic of Altai |
| <i>mongola ukokana</i>    | Mnt20     | ♂   | hp4a             | -         | -   | -    | 2022 | (06) Russia, Republic of Altai |
| <i>mongola ukokana</i>    | Mnt21     | ♂   | hp4a             | -         | -   | -    | 2022 | (06) Russia, Republic of Altai |
| <i>mongola ukokana</i>    | Mnt22     | ♂   | hp4a             | -         | -   | -    | 2022 | (06) Russia, Republic of Altai |
| <i>mongola ukokana</i>    | Mnt23     | ♂   | hp2              | -         | -   | -    | 2022 | (06) Russia, Republic of Altai |
| <i>mongola ukokana</i>    | Nsk014    | ♂   | hp3a             | n/a       | n/a | n/a  | 1997 | (07) Russia, Republic of Altai |
| <i>mongola ukokana</i>    | Mnt34z    | ♂   | hp3a             | n/a       | n/a | n/a  | 1997 | (07) Russia, Republic of Altai |
| <i>mongola ukokana</i> PT | Nsk015    | ♂   | hp4c             | n/a       | n/a | n/a  | 1995 | (08) Russia, Republic of Altai |
| <i>mongola ukokana</i>    | Mnt24     | ♂   | hp3a             | -         | -   | -    | 2001 | (09) Russia, Republic of Altai |
| <i>mongola ukokana</i>    | Mnt25     | ♀   | hp1a             | -         | -   | -    | 2001 | (09) Russia, Republic of Altai |
| <i>mongola ukokana</i>    | Mnt26     | ♂   | hp4a             | -         | -   | -    | 2001 | (09) Russia, Republic of Altai |
| <i>mongola ukokana</i>    | Mnt27     | ♀   | hp3a             | -         | -   | -    | 2001 | (09) Russia, Republic of Altai |
| <i>mongola ukokana</i>    | Mnt28     | ♀   | hp4a             | -         | -   | -    | 2001 | (09) Russia, Republic of Altai |
| <i>mongola ukokana</i>    | Mnt29     | ♂   | hp4a             | -         | -   | -    | 2001 | (09) Russia, Republic of Altai |

|                        |             |   |      |     |     |     |      |                                |
|------------------------|-------------|---|------|-----|-----|-----|------|--------------------------------|
| <i>mongola ukokana</i> | Mnt30       | ♂ | hp3a | -   | -   | -   | 2001 | (09) Russia, Republic of Altai |
| <i>mongola ukokana</i> | Mnt31       | ♂ | hp3a | -   | -   | -   | 2001 | (09) Russia, Republic of Altai |
| <i>mongola ukokana</i> | Mnt32       | ♂ | hp4a | -   | -   | -   | 2001 | (09) Russia, Republic of Altai |
| <i>mongola ukokana</i> | Mnt33       | ♂ | hp3a | -   | -   | -   | 2001 | (09) Russia, Republic of Altai |
| <i>mongola ukokana</i> | Mnt34       | ♂ | hp3a | -   | -   | -   | 2001 | (09) Russia, Republic of Altai |
| <i>mongola ukokana</i> | Mnt35       | ♂ | hp4a | -   | -   | -   | 2001 | (09) Russia, Republic of Altai |
| <i>mongola ukokana</i> | Mnt36       | ♂ | hp3a | -   | -   | -   | 2001 | (09) Russia, Republic of Altai |
| <i>mongola ukokana</i> | Mnt37       | ♂ | hp3a | -   | -   | -   | 2001 | (09) Russia, Republic of Altai |
| <i>mongola ukokana</i> | Mnt38       | ♂ | hp3a | -   | -   | -   | 2001 | (09) Russia, Republic of Altai |
| <i>mongola ukokana</i> | Mnt39       | ♂ | hp3a | -   | -   | -   | 2001 | (09) Russia, Republic of Altai |
| <i>mongola ukokana</i> | Mnt44       | ♂ | hp4a | -   | -   | -   | 2001 | (09) Russia, Republic of Altai |
| <i>mongola ukokana</i> | Mnt45       | ♂ | hp4a | -   | -   | -   | 2001 | (09) Russia, Republic of Altai |
| <i>mongola ukokana</i> | Mnt46       | ♂ | hp3a | -   | -   | -   | 2001 | (09) Russia, Republic of Altai |
| <i>mongola ukokana</i> | Mnt47       | ♂ | hp3d | -   | -   | -   | 2001 | (09) Russia, Republic of Altai |
| <i>mongola ukokana</i> | Mnt48       | ♂ | hp3a | -   | -   | -   | 2001 | (09) Russia, Republic of Altai |
| <i>mongola ukokana</i> | Mnt49       | ♂ | hp3a | -   | -   | -   | 2001 | (09) Russia, Republic of Altai |
| <i>mongola ukokana</i> | Mnt50       | ♂ | hp3d | -   | -   | -   | 2001 | (09) Russia, Republic of Altai |
| <i>mongola ukokana</i> | Mnt51       | ♂ | hp3a | -   | -   | -   | 2001 | (09) Russia, Republic of Altai |
| <i>mongola ukokana</i> | Ku01        | ♀ | hp3e | -   | -   | -   | 2022 | (09) Russia, Republic of Altai |
| <i>mongola ukokana</i> | Ku02        | ♀ | hp2  | +   | +   | +   | 2022 | (09) Russia, Republic of Altai |
| <i>mongola ukokana</i> | Ku03        | ♂ | hp4a | -   | -   | -   | 2022 | (09) Russia, Republic of Altai |
| <i>mongola ukokana</i> | Ku04        | ♂ | hp4a | -   | -   | -   | 2022 | (09) Russia, Republic of Altai |
| <i>mongola ukokana</i> | Mnt28z      | ♂ | hp3a | -   | -   | -   | 2022 | (09) Russia, Republic of Altai |
| <i>mongola ukokana</i> | Mnt29z      | ♀ | hp3e | -   | -   | -   | 2022 | (09) Russia, Republic of Altai |
| <i>mongola ukokana</i> | Mnt30z      | ♂ | hp3d | -   | -   | -   | 2022 | (09) Russia, Republic of Altai |
| <i>mongola ukokana</i> | LOWA141-06* | ♂ | hp3a | n/a | n/a | n/a | 1999 | (09) Russia, Republic of Altai |
| <i>mongola ukokana</i> | LOWA818-06* | ♂ | hp3a | n/a | n/a | n/a | 1999 | (09) Russia, Republic of Altai |
| <i>mongola ukokana</i> | LOWA142-06* | ♂ | hp4b | n/a | n/a | n/a | 1999 | (09) Russia, Republic of Altai |
| <i>mongola ukokana</i> | CL42m       | ♀ | hp1a | -   | -   | -   | 2017 | (09) Russia, Republic of Altai |
| <i>mongola ukokana</i> | Mnt17       | ♀ | hp1a | -   | -   | -   | 2022 | (10) Russia, Republic of Altai |
| <i>mongola ukokana</i> | Mnt40       | ♀ | hp2  | +   | +   | +   | 2003 | (10) Russia, Republic of Altai |
| <i>mongola ukokana</i> | Mnt41       | ♂ | hp3a | -   | -   | -   | 2003 | (10) Russia, Republic of Altai |
| <i>mongola ukokana</i> | Mnt42       | ♂ | hp3a | -   | -   | -   | 2003 | (10) Russia, Republic of Altai |
| <i>mongola ukokana</i> | Mnt43       | ♂ | hp3a | -   | -   | -   | 2003 | (10) Russia, Republic of Altai |
| <i>mongola ukokana</i> | Mnt09       | ♂ | hp3a | -   | -   | -   | 2002 | (11) Russia, Republic of Altai |
| <i>mongola ukokana</i> | Mnt10       | ♂ | hp3a | -   | -   | -   | 2002 | (11) Russia, Republic of Altai |
| <i>mongola ukokana</i> | Mnt08       | ♂ | hp3a | -   | -   | -   | 2003 | (12) Russia, Republic of Altai |
| <i>mongola ukokana</i> | Mnt12       | ♂ | hp3a | -   | -   | -   | 2003 | (12) Russia, Republic of Altai |
| <i>mongola</i>         | Mnt14       | ♀ | hp2  | +   | +   | +   | 2010 | (13) Russia, Republic of Tyva  |
| <i>mongola</i>         | Mnt15       | ♀ | hp3a | -   | -   | -   | 2010 | (13) Russia, Republic of Tyva  |
| <i>mongola</i>         | Mnt07       | ♂ | hp2  | -   | -   | -   | 2002 | (14) Russia, Republic of Tyva  |
| <i>mongola</i>         | CL35m       | ♀ | hp1b | -   | -   | -   | 2002 | (14) Russia, Republic of Tyva  |
| <i>mongola</i>         | CL37m       | ♂ | hp1b | -   | -   | -   | 2002 | (14) Russia, Republic of Tyva  |
| <i>mongola</i>         | CL38m       | ♀ | hp1a | -   | -   | -   | 2002 | (14) Russia, Republic of Tyva  |
| <i>mongola</i>         | CL54m       | ♂ | hp1b | -   | -   | -   | 2002 | (14) Russia, Republic of Tyva  |
| <i>mongola</i>         | CL55m       | ♂ | hp4a | -   | -   | -   | 2002 | (14) Russia, Republic of Tyva  |
| <i>mongola</i>         | CL56m       | ♂ | hp1b | -   | -   | -   | 2002 | (14) Russia, Republic of Tyva  |
| <i>mongola</i>         | CL57m       | ♀ | hp1b | -   | -   | -   | 2002 | (14) Russia, Republic of Tyva  |
| <i>mongola</i>         | Mnt26z      | ♂ | hp1a | -   | -   | -   | 2002 | (14) Russia, Republic of Tyva  |
| <i>mongola</i>         | Mnt05       | ♀ | hp1b | -   | -   | -   | 2001 | (15) Russia, Republic of Tyva  |
| <i>mongola</i>         | Mnt06       | ♀ | hp1b | -   | -   | -   | 2001 | (15) Russia, Republic of Tyva  |
| <i>mongola</i> LT      | 20022A03    | ♂ | hp1b | n/a | n/a | n/a | ?    | (??) see text for explanation  |

|                |             |   |      |     |     |     |      |                         |
|----------------|-------------|---|------|-----|-----|-----|------|-------------------------|
| <i>sidonia</i> | S1-22064B02 | ♀ | hp1b | n/a | n/a | n/a | 1967 | (18) Mongolia, Khovsgol |
| <i>sidonia</i> | S2-22064B03 | ♀ | hp1b | n/a | n/a | n/a | 1966 | (18) Mongolia, Khovsgol |
| <i>sidonia</i> | S3-22064B04 | ♂ | hp1b | n/a | n/a | n/a | 1967 | (18) Mongolia, Khovsgol |
| <i>sidonia</i> | S4-22064B05 | ♂ | hp1b | n/a | n/a | n/a | 1967 | (18) Mongolia, Khovsgol |
