# Supplementary material for: Phylogeography of Two Enigmatic Sulphur Butterflies, Colias mongola Alphéraky, 1897 and Colias tamerlana Staudinger, 1897 (Lepidoptera, Pieridae), with Relations to Wolbachia Infection
Source: MDPI journal article supplement (doi:10.3390/insects14120943), 2023-12-13
Supplement: s1 [file s1]

**Table S2.** List of studied materials with GenBank accession numbers for sequence records.

| Taxon                | Sample ID | COI<br>haplotype | GenBank Accession Number |          |          |           |          | Wolbachia |          |
|----------------------|-----------|------------------|--------------------------|----------|----------|-----------|----------|-----------|----------|
|                      |           |                  | COI                      | CAD      | H3       | CA-ATPase | 16S      | wsp       | fts-z    |
| <i>tamerlana</i>     | Akr01     | hp3a             | OP946559                 | -        | -        | -         | -        | -         | -        |
| <i>tamerlana</i>     | Akr02     | hp3a             | OP946560                 | -        | -        | -         | -        | -         | -        |
| <i>tamerlana</i>     | Akr03     | hp3a             | OP946561                 | -        | -        | -         | -        | -         | -        |
| <i>tamerlana</i>     | Akr04     | hp3a             | OP946562                 | -        | -        | -         | -        | -         | -        |
| <i>tamerlana</i>     | CL162     | hp3a             | OP946563                 | -        | -        | -         | -        | -         | -        |
| <i>tamerlana</i> LT  | 21128B07  | hp1b             | OP946564                 | -        | -        | -         | -        | -         | -        |
| <i>tamerlana</i> PLT | 20022A02  | hp1b             | OP946565                 | -        | -        | -         | -        | -         | -        |
| <i>mongola</i>       | Mnt03     | hp1b             | OP946566                 | -        | -        | -         | -        | -         | -        |
| <i>mongola</i>       | Mnt04     | hp3b             | OP946567                 | OQ192178 | OQ192144 | OQ192161  | -        | -         | -        |
| <i>mongola</i>       | CL34m     | hp1c             | OP946568                 | OQ192179 | OQ192145 | OQ192162  | -        | -         | -        |
| <i>mongola</i>       | Mnt54     | hp1b             | OP946569                 | -        | -        | -         | -        | -         | -        |
| <i>mongola</i>       | Mnt55     | hp2              | OP946570                 | -        | -        | -         | OQ155222 | OQ192116  | OQ192130 |
| <i>mongola</i>       | Mnt56     | hp1b             | OP946571                 | -        | -        | -         | -        | -         | -        |
| <i>mongola</i>       | Mnt57     | hp1b             | OP946572                 | -        | -        | -         | -        | -         | -        |
| <i>mongola</i>       | Mnt58     | hp2              | OP946573                 | -        | -        | -         | OQ155223 | OQ192117  | OQ192131 |
| <i>mongola</i>       | Mnt59     | hp3a             | OP946574                 | -        | -        | -         | -        | -         | -        |
| <i>mongola</i>       | Mnt60     | hp2              | OP946575                 | -        | -        | -         | OQ155224 | OQ192118  | OQ192132 |
| <i>mongola</i>       | Mnt61     | hp1b             | OP946576                 | -        | -        | -         | -        | -         | -        |
| <i>mongola</i>       | Mnt62     | hp2              | OP946577                 | -        | -        | -         | OQ155225 | OQ192119  | OQ192133 |
| <i>mongola</i>       | Mnt63     | hp1b             | OP946578                 | -        | -        | -         | -        | -         | -        |
| <i>mongola</i>       | Mnt01     | hp2              | OP946579                 | -        | -        | -         | OQ155226 | OQ192120  | OQ192134 |
| <i>mongola</i>       | Mnt02     | hp2              | OP946580                 | -        | -        | -         | OQ155227 | OQ192121  | OQ192135 |
| <i>mongola</i>       | CL41m     | hp2              | OP946581                 | -        | -        | -         | OQ155228 | OQ192122  | OQ192136 |
| <i>mongola</i>       | Nsk16     | hp2              | OP946582                 | -        | -        | -         | -        | -         | -        |
| <i>mongola</i>       | CL39m     | hp2              | OP946583                 | OQ192180 | OQ192146 | OQ192163  | OQ155229 | OQ192123  | OQ192137 |
| <i>mongola</i>       | CL40m     | hp3a             | OP946584                 | OQ192181 | OQ192147 | OQ192164  | -        | -         | -        |
| <i>mongola</i>       | CL43m     | hp2              | OP946585                 | OQ192182 | OQ192148 | OQ192165  | OQ155230 | OQ192124  | OQ192138 |
| <i>mongola</i>       | Mnt24z    | hp3a             | OP946586                 | -        | -        | -         | -        | -         | -        |
| <i>mongola</i>       | Mnt25z    | hp4a             | OP946587                 | -        | -        | -         | -        | -         | -        |

|                           |        |      |          |          |          |          |          |          |          |
|---------------------------|--------|------|----------|----------|----------|----------|----------|----------|----------|
| <i>mongola</i>            | Mnt53  | hp2  | OP946588 | -        | -        | -        | OQ155231 | OQ192125 | OQ192139 |
| <i>mongola ukokana</i>    | Mnt18  | hp2  | OP946589 | OQ192183 | OQ192149 | OQ192166 | OQ155232 | OQ192126 | OQ192140 |
| <i>mongola ukokana</i>    | Mnt19  | hp3c | OP946590 | -        | -        | -        | -        | -        | -        |
| <i>mongola ukokana</i>    | Mnt20  | hp4a | OP946591 | OQ192184 | OQ192150 | OQ192167 | -        | -        | -        |
| <i>mongola ukokana</i>    | Mnt21  | hp4a | OP946592 | OQ192185 | OQ192151 | OQ192168 | -        | -        | -        |
| <i>mongola ukokana</i>    | Mnt22  | hp4a | OP946593 | -        | -        | -        | -        | -        | -        |
| <i>mongola ukokana</i>    | Mnt23  | hp2  | OP946594 | -        | -        | -        | -        | -        | -        |
| <i>mongola ukokana</i>    | Nsk014 | hp3a | OP946595 | -        | -        | -        | -        | -        | -        |
| <i>mongola ukokana</i>    | Mnt34z | hp3a | OP946596 | -        | -        | -        | -        | -        | -        |
| <i>mongola ukokana</i> PT | Nsk015 | hp4c | OP946597 | -        | -        | -        | -        | -        | -        |
| <i>mongola ukokana</i>    | Mnt24  | hp3a | OP946598 | -        | -        | -        | -        | -        | -        |
| <i>mongola ukokana</i>    | Mnt25  | hp1a | OP946599 | -        | -        | -        | -        | -        | -        |
| <i>mongola ukokana</i>    | Mnt26  | hp4a | OP946600 | -        | -        | -        | -        | -        | -        |
| <i>mongola ukokana</i>    | Mnt27  | hp3a | OP946601 | -        | -        | -        | -        | -        | -        |
| <i>mongola ukokana</i>    | Mnt28  | hp4a | OP946602 | -        | -        | -        | -        | -        | -        |
| <i>mongola ukokana</i>    | Mnt29  | hp4a | OP946603 | -        | -        | -        | -        | -        | -        |
| <i>mongola ukokana</i>    | Mnt30  | hp3a | OP946604 | -        | -        | -        | -        | -        | -        |
| <i>mongola ukokana</i>    | Mnt31  | hp3a | OP946605 | -        | -        | -        | -        | -        | -        |
| <i>mongola ukokana</i>    | Mnt32  | hp4a | OP946606 | -        | -        | -        | -        | -        | -        |
| <i>mongola ukokana</i>    | Mnt33  | hp3a | OP946607 | -        | -        | -        | -        | -        | -        |
| <i>mongola ukokana</i>    | Mnt34  | hp3a | OP946608 | -        | -        | -        | -        | -        | -        |
| <i>mongola ukokana</i>    | Mnt35  | hp4a | OP946609 | -        | -        | -        | -        | -        | -        |
| <i>mongola ukokana</i>    | Mnt36  | hp3a | OP946610 | -        | -        | -        | -        | -        | -        |
| <i>mongola ukokana</i>    | Mnt37  | hp3a | OP946611 | -        | -        | -        | -        | -        | -        |
| <i>mongola ukokana</i>    | Mnt38  | hp3a | OP946612 | -        | -        | -        | -        | -        | -        |
| <i>mongola ukokana</i>    | Mnt39  | hp3a | OP946613 | -        | -        | -        | -        | -        | -        |
| <i>mongola ukokana</i>    | Mnt44  | hp4a | OP946614 | -        | -        | -        | -        | -        | -        |
| <i>mongola ukokana</i>    | Mnt45  | hp4a | OP946615 | -        | -        | -        | -        | -        | -        |
| <i>mongola ukokana</i>    | Mnt46  | hp3a | OP946616 | -        | -        | -        | -        | -        | -        |
| <i>mongola ukokana</i>    | Mnt47  | hp3d | OP946617 | -        | -        | -        | -        | -        | -        |
| <i>mongola ukokana</i>    | Mnt48  | hp3a | OP946618 | -        | -        | -        | -        | -        | -        |
| <i>mongola ukokana</i>    | Mnt49  | hp3a | OP946619 | -        | -        | -        | -        | -        | -        |
| <i>mongola ukokana</i>    | Mnt50  | hp3d | OP946620 | -        | -        | -        | -        | -        | -        |

|                        |             |      |          |          |          |          |          |          |          |
|------------------------|-------------|------|----------|----------|----------|----------|----------|----------|----------|
| <i>mongola ukokana</i> | Mnt51       | hp3a | OP946621 | -        | -        | -        | -        | -        | -        |
| <i>mongola ukokana</i> | Ku01        | hp3e | OP946622 | OQ192186 | OQ192152 | OQ192169 | -        | -        | -        |
| <i>mongola ukokana</i> | Ku02        | hp2  | OP946623 | OQ192187 | OQ192153 | OQ192170 | OQ155233 | OQ192127 | OQ192141 |
| <i>mongola ukokana</i> | Ku03        | hp4a | OP946624 | OQ192188 | OQ192154 | OQ192171 | -        | -        | -        |
| <i>mongola ukokana</i> | Ku04        | hp4a | OP946625 | OQ192189 | OQ192155 | OQ192172 | -        | -        | -        |
| <i>mongola ukokana</i> | Mnt28z      | hp3a | OP946626 | OQ192190 | OQ192156 | OQ192173 | -        | -        | -        |
| <i>mongola ukokana</i> | Mnt29z      | hp3e | OP946627 | OQ192191 | OQ192157 | OQ192174 | -        | -        | -        |
| <i>mongola ukokana</i> | Mnt30z      | hp3d | OP946628 | OQ192192 | OQ192158 | OQ192175 | -        | -        | -        |
| <i>mongola ukokana</i> | CL42m       | hp1a | OP946629 | OQ192193 | OQ192159 | OQ192176 | -        | -        | -        |
| <i>mongola ukokana</i> | Mnt17       | hp1a | OP946630 | OQ192194 | OQ192160 | OQ192177 | -        | -        | -        |
| <i>mongola ukokana</i> | Mnt40       | hp2  | OP946631 | -        | -        | -        | OQ155234 | OQ192128 | OQ192142 |
| <i>mongola ukokana</i> | Mnt41       | hp3a | OP946632 | -        | -        | -        | -        | -        | -        |
| <i>mongola ukokana</i> | Mnt42       | hp3a | OP946633 | -        | -        | -        | -        | -        | -        |
| <i>mongola ukokana</i> | Mnt43       | hp3a | OP946634 | -        | -        | -        | -        | -        | -        |
| <i>mongola ukokana</i> | Mnt09       | hp3a | OP946635 | -        | -        | -        | -        | -        | -        |
| <i>mongola ukokana</i> | Mnt10       | hp3a | OP946636 | -        | -        | -        | -        | -        | -        |
| <i>mongola ukokana</i> | Mnt08       | hp3a | OP946637 | -        | -        | -        | -        | -        | -        |
| <i>mongola ukokana</i> | Mnt12       | hp3a | OP946638 | -        | -        | -        | -        | -        | -        |
| <i>mongola</i>         | Mnt14       | hp2  | OP946639 | -        | -        | -        | OQ155235 | OQ192129 | OQ192143 |
| <i>mongola</i>         | Mnt15       | hp3a | OP946640 | -        | -        | -        | -        | -        | -        |
| <i>mongola</i>         | Mnt07       | hp2  | OP946641 | -        | -        | -        | -        | -        | -        |
| <i>mongola</i>         | CL35m       | hp1b | OP946642 | -        | -        | -        | -        | -        | -        |
| <i>mongola</i>         | CL37m       | hp1b | OP946643 | -        | -        | -        | -        | -        | -        |
| <i>mongola</i>         | CL38m       | hp1a | OP946644 | -        | -        | -        | -        | -        | -        |
| <i>mongola</i>         | CL54m       | hp1b | OP946645 | -        | -        | -        | -        | -        | -        |
| <i>mongola</i>         | CL55m       | hp4a | OP946646 | -        | -        | -        | -        | -        | -        |
| <i>mongola</i>         | CL56m       | hp1b | OP946647 | -        | -        | -        | -        | -        | -        |
| <i>mongola</i>         | CL57m       | hp1b | OP946648 | -        | -        | -        | -        | -        | -        |
| <i>mongola</i>         | Mnt26z      | hp1a | OP946649 | -        | -        | -        | -        | -        | -        |
| <i>mongola</i>         | Mnt05       | hp1b | OP946650 | -        | -        | -        | -        | -        | -        |
| <i>mongola</i>         | Mnt06       | hp1b | OP946651 | -        | -        | -        | -        | -        | -        |
| <i>mongola LT</i>      | 20022A03    | hp1b | OP946652 | -        | -        | -        | -        | -        | -        |
| <i>sidonia</i>         | S1-22064B02 | hp1b | OR178498 | -        | -        | -        | -        | -        | -        |

|                |             |      |          |          |          |          |   |   |   |
|----------------|-------------|------|----------|----------|----------|----------|---|---|---|
| <i>sidonia</i> | S2-22064B03 | hp1b | OR178499 | -        | -        | -        | - | - | - |
| <i>sidonia</i> | S3-22064B04 | hp1b | OR178500 | -        | -        | -        | - | - | - |
| <i>sidonia</i> | S4-22064B05 | hp1b | OR178501 | -        | -        | -        | - | - | - |
| <i>croceus</i> | CL151       |      | OR178497 | OR539270 | OR539252 | OR539269 | - | - | - |
